# Supplementary material
Source: publisher figshare collection journal article supplement (https://future-science-group.figshare.com/ndownloader/files/31810547)
Supplement: Supplementary file 1 [file 31810547]

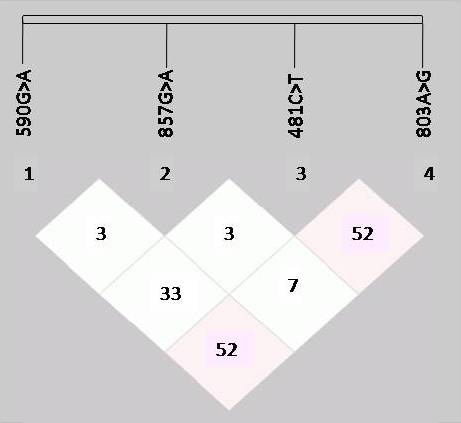


**Supplementary Fig. 1:** Showing pairwise linkage disequilibrium (*D*′) between the four variants of *NAT2* gene, wherein pink shows the average LD and white depicts the minimum LD between the polymorphic sites.


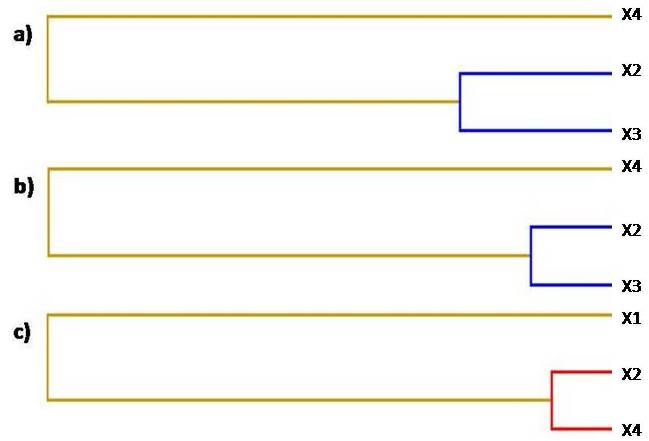


**Supplementary Fig. 2:** The multifactor dimensionality reduction (MDR) interaction dendrogram a) overall, b) smokers, and c) non-smokers.(Note: X1- NAT2*6 590G>A, X2- NAT2*7 857G>A, X3- NAT2*5 481C>T, X4- NAT2*5 803A>G)


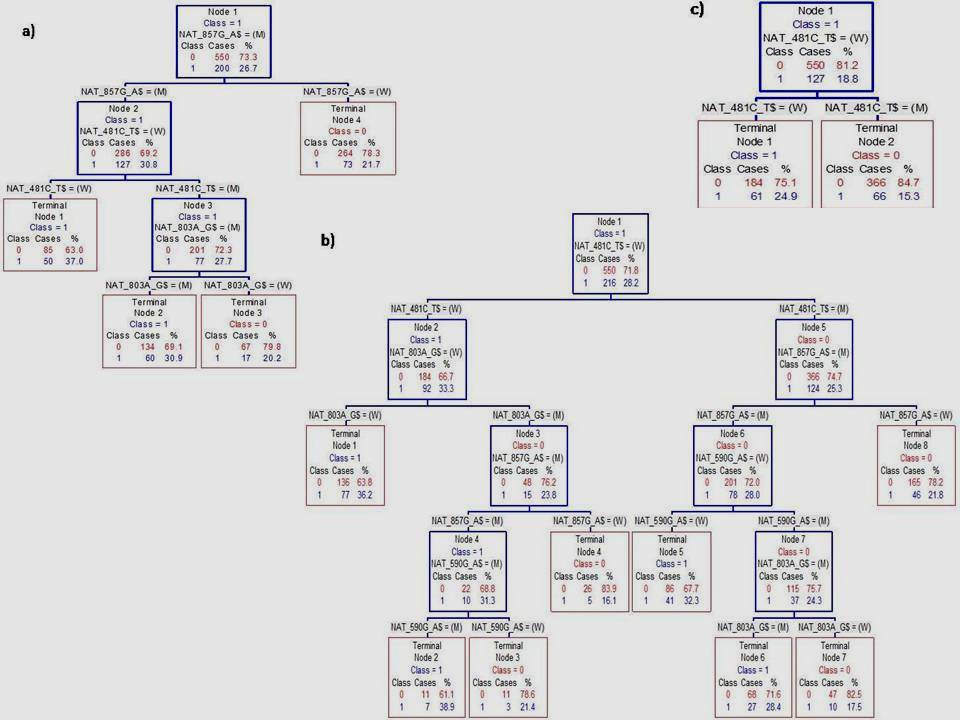


**Supplementary Fig. 3:** CART analysis in polymorphic *NAT2* on basis of histology, a) ADCC, b) SQCC, and c) SCLC. W= homozygous wild type genotype, M = heterozygous + homozygous variant genotype
